# Supplementary material
Source: publisher figshare collection journal article supplement (https://acs.figshare.com/ndownloader/files/4092973)
Supplement: Supplementary file 1 [file 4092973]

**Supporting Information for:**

# **Hybrid Carbon Nanotube Networks as Efficient Hole Extraction Layers for Organic Photovoltaics**

G. Dinesha M. R. Dabera <sup>‡§</sup>, K. D. G. Imalka Jayawardena <sup>‡§</sup>, M. R. Ranga Prabath <sup>§</sup>, Iskandar Yahya <sup>§</sup>, Y. Yuan Tan <sup>§</sup>, N. Aamina Nismy <sup>§</sup>, Hidetsugu Shiozawa <sup>‡</sup>, Markus Sauer <sup>‡</sup>, G. Ruiz-Soria <sup>‡</sup>, Paola Ayala <sup>‡</sup>, Vlad Stolojan <sup>§</sup>, A. A. Damitha T. Adikaari <sup>§†</sup>, Peter D. Jarowski <sup>§</sup>, Thomas Pichler <sup>‡</sup>, S. Ravi P. Silva <sup>§\*</sup>

*§ Advanced Technology Institute, University of Surrey, Guildford, Surrey, GU2 7XH, United Kingdom*

*‡ Elektronische Materialeigenschaften, Fakultät für Physik, Universität Wien, Strudlhofgasse, 4, 1090, Wien, Austria*

E-mail: s.silva@surrey.ac.uk

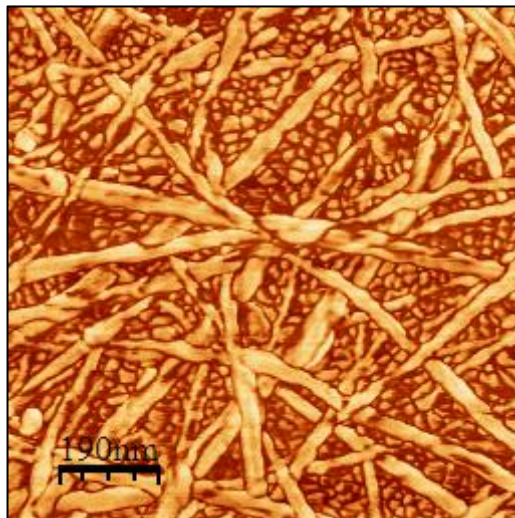

**Figure S1.** A magnified AFM phase image of a  $\sim 0.5 \text{ mg ml}^{-1}$  solution spin coated on ITO/Glass at a spin speed of 1500 rpm. The scan area is 973nm x 973 nm. The image displays the well percolated and dispersed networks of nanohybrids on substrates.

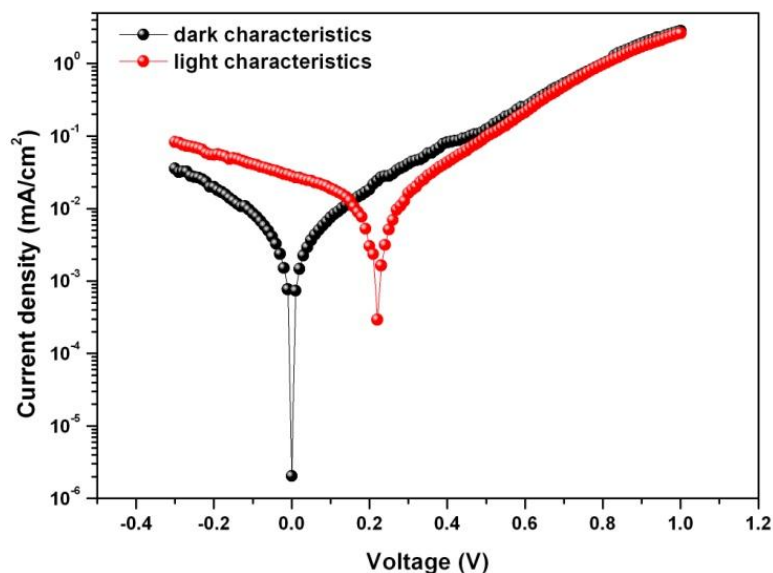

**Figure S2.** The response of the “hole only” nanohybrid incorporated device under dark condition and upon illumination with AM 1.5G simulated light. The observed merging of light and dark characteristics at  $\sim 0.5 \text{ V}$  indicates the built in potential of the system to be at this value.

### **Fabrication of hole only devices for hole mobility calculations**

To calculate the hole mobility of OPV devices incorporating nanohybrids and PEDOT:PSS as the hole transport layer (HTL), devices were fabricated using the following procedure.

**Nanohybrids incorporated device:** A portion of rr-P3HT/s-SWNT solution ( $\sim 0.02 \text{ mg ml}^{-1}$ ) was spin coated on cleaned ITO coated glass (as given under methods section) at a speed of 1500 rpm for 1 minute and was annealed at a temperature of  $120^\circ\text{C}$  for 10 minutes. The active layer consisting of PTB7/PC<sub>70</sub>BM was spin coated at 1000 rpm for 2 mins on top of the rr-P3HT/s-SWNT film where the active layer thickness is 100 nm.

**PEDOT:PSS incorporated device:** A diluted solution of PEDOT:PSS was spin coated on cleaned ITO coated glass (same cleaning procedure as above) at a speed of 5000 rpm for 40 seconds to obtain a thickness of 4 nm and was annealed at a temperature of  $155^\circ\text{C}$  for 10 minutes. The active layer consisting of PTB7/PC<sub>70</sub>BM was spin coated at 1000 rpm for 2 mins on top of the PEDOT:PSS film where the active layer thickness is 100 nm.

**PTB7/PC<sub>70</sub>BM active layer:** A mass of 10.00 mg of PTB7 (1-material Chemscitech Inc.) and 15.00 mg of PC<sub>70</sub>BM (99% pure; Solenne) were added to 1.0 ml of chlorobenzene/1,8-diiodooctane (97:3 vol%) and the solution was stirred overnight at  $70^\circ\text{C}$  after which filtering of the solution was carried out using a  $0.2 \mu\text{m}$  filter.

After slow drying of the active layers in a glove box (MBRAUN), the devices were transferred to a thermal evaporator outside glove box where 10 nm of MoO<sub>x</sub> was deposited through thermal evaporation at a rate of  $\sim 0.2 \text{ \AA s}^{-1}$ . The devices were then transferred to a thermal evaporator inside the glove box where 80 nm of Al (80 nm) was then thermally evaporated under vacuum of  $< 3 \times 10^{-6} \text{ mbar}$  yielding a device with area  $54 \text{ mm}^2$ . Current density – Voltage (J-V) measurements were performed using a Keithley 2400 at room temperature.

## Hole mobility calculations based on SCLC model

Field independent Mott-Gurney equation:<sup>1</sup>

$$J = \frac{9}{8} \epsilon_0 \epsilon_r \mu \frac{(V - V_{bi})^2}{L^3}$$

Was used to calculate the hole mobilities of the devices where,  $J$  is the current density,  $\epsilon_0$  is the permittivity of free space,  $\epsilon_r$  is the relative permittivity of the organic layer (considered as 3),<sup>1</sup>  $V$  is the applied potential,  $V_{bi}$  is the built in potential,  $L$  is the thickness of the device and  $\mu$  is the hole mobility.  $V_{bi}$  was calculated considering the intersection point of the dark and light current-voltage curves of hole only devices.

The  $\mu$  value of both types of devices were estimated based on the linear region of figure. S3 where  $J$  is proportional to  $(V - V_{bi})^2$  (space charge limited region).

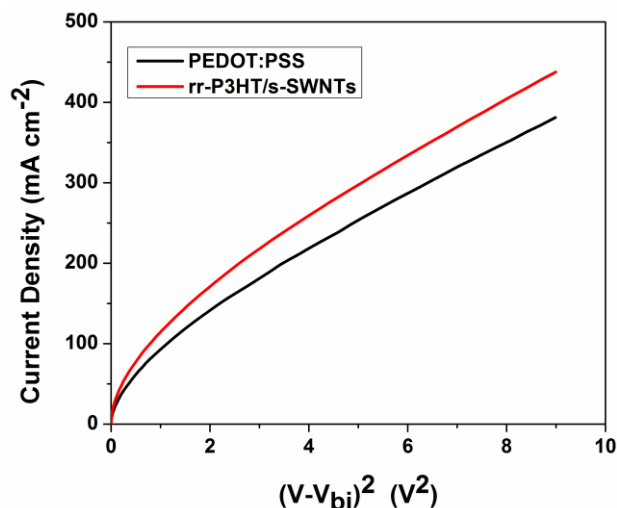

**Figure S3.**  $J - (V - V_{bi})$  characteristics of nanohybrids and PEDOT:PSS incorporated hole only devices for SCLC analysis.

## References

1. Blom, P. W. M.; de Jong, M. J. M.; Vleggaar, J. J. M. Electron and hole transport in poly(p-phenylene vinylene) devices. *Appl Phys Lett* **1996**, 68, 3308-3310.
